# Supplementary material for: The neuronal calcium sensor Synaptotagmin-1 and SNARE proteins cooperate to dilate fusion pores
Source: eLife journal article supplement (doi:10.7554/elife.68215), 2021-06-30
Supplement: supp [file NDconcentration.xlsx]

## Sheet: 50nM_NDs
Files opened first in Patchmaster. Filtered at 40-100 Hz. If baseline not stable, ignore recording!!
Export to Matlab:	t=0 is when patch started
use default values for processing traces as much as possible
block size for removing outliers	100						for records with more than one trace: not sure how long passed since end of first trace
cutoff (multiple of SD)	2.5-3						(ZW tries to get a stable baseline by sucking, etc)
block size for averaging trace	80						shift by T1 total record time + IV record time (if present) + 10 sec (typical time spent on reestablishing a stable baseline)
Excise processed trace containing baseline	append "p"	ZW130415C1T2O1p	use to display and plot many openings together, analyze noise in baseline
excise only opening (baseline excluded)	append "pe"	ZW130415C1T2O1pe	use to calculate t_open, t_end, duration, avg level, level histogram...
	each sweep is 40 s	patchmaster, 40Hz filter, scale 100-300			t_tot= (40-x) + [sf- (si+1)]*40 + y
file	baseline stable from sweep si	time x, s in sweep si	till sweep sf	time y in sf	total recording time with stable baseline, s	type	comments	include in analysis?	# Openings (isolated or train)	FR/min	# trains	#terminal opening?	exported to Matlab?	remove outliers block size	remove outliers cutoff (multiple of std dev)	lowpass filtered?	freqs removed	block size for averaging	thresh, pA	minPts
ZW190618C1	1	0	20	40	800	50nMNDs_vNLP8_tC_100CaPIP2	T15	1	1	0.075
ZW190618C2	1	0	20	40	800	50nMNDs_vNLP8_tC_100CaPIP2	T20	1	1	0.075
ZW190618C3	1	0	20	40	800	50nMNDs_vNLP8_tC_100CaPIP2	0, good but see some ion channels	1	0	0
ZW190618C4	1	0	20	40	800	50nMNDs_vNLP8_tC_100CaPIP2	T13,T15,T20	1	3	0.225
ZW190618C5	1	0	18	35	715	50nMNDs_vNLP8_tC_100CaPIP2	T18-19,T20. Noisy after T18. Ignore long pore T18-19 and T20. Include short one in T18. ZW190618C5T18EKa	1	1	0.0839161
ZW190621C4	1	25	20	40	775	50nMNDs_vNLP8_tC_100CaPIP2	T20. Pore at the very end of trace, but looks OK. include	1	1	0.0774194
ZW190717C3	22	0	40	40	760	50nMNDs_vNLP8_tC_100CaPIP2	T26,T29,T30-34,T36-38; gapfree1 baseline is bad. T29 continues into T30. T29T30EKa, T30-34 very long pore! (included) .	1	4	0.315789
ZW190718C8	1	0	5	15	175	50nMNDs_vNLP8_tC_100CaPIP2	T1,T2,T3,T4,T5-6,T8-9,T10-11,T13,T17. Baseline questionable after T5 (ignore).	1	5	1.71429
ZW190726C8	1	0	17	15	655	50nMNDs_vNLP8_tC_100CaPIP2	T17. Something goes wrong in T17 and baseline starts drifting. NO pores.	1	0	0
ZW190729C12	1	0	8	40	320	50nMNDs_vNLP8_tC_100CaPIP2	T4,T8; cell dropped at T8	1	1	0.1875
ZW190730C5	1	0	20	15	775	50nMNDs_vNLP8_tC_100CaPIP2	T15	1	1	0.0774194
ZW190730C6	1	5	11	35	430	50nMNDs_vNLP8_tC_100CaPIP2	T2,T11-13, baseline not backt at T13. Added short pore T5 (T5EKa)	1	2	0.27907
								cells:	FPs:	FR/min
				total rec. s	7805		sum	12	20	0.2592
							stdev			0.469644
							stderr			0.135575

## Sheet: 100nM_NDs
Files opened first in Patchmaster. Filtered at 40-100 Hz. If baseline not stable, ignore recording!!
Export to Matlab:	t=0 is when patch started
use default values for processing traces as much as possible
block size for removing outliers	100						for records with more than one trace: not sure how long passed since end of first trace
cutoff (multiple of SD)	2.5-3						(ZW tries to get a stable baseline by sucking, etc)
block size for averaging trace	80						shift by T1 total record time + IV record time (if present) + 10 sec (typical time spent on reestablishing a stable baseline)
Excise processed trace containing baseline	append "p"	ZW130415C1T2O1p	use to display and plot many openings together, analyze noise in baseline
excise only opening (baseline excluded)	append "pe"	ZW130415C1T2O1pe	use to calculate t_open, t_end, duration, avg level, level histogram...
	each sweep is 40 s	patchmaster, 40Hz filter, scale 100-300			t_tot= (40-x) + [sf- (si+1)]*40 + y
file	baseline stable from sweep si	time x, s in sweep si	till sweep sf	time y in sf	total recording time with stable baseline, s	type	comments	include in analysis?	# Openings (isolated or train)		Fusion rate per cell (bursts/min)	exported to Matlab?	remove outliers block size	remove outliers cutoff (multiple of std dev)	lowpass filtered?	freqs removed	block size for averaging	thresh, pA	minPts
ZW151008C1	7	40	20	40	520	vNLP8/0 C2AB/20uMPiP2/2mMATP/100 uM Ca/tCell	T5, 6. s1-3 and s7-10 baseline bad.	1	3		0.346154							-0.25	15	time shifted by 20sw*40s+10s (IV)=810s
ZW151008C2	4	0	15	40	480	vNLP8/0 C2AB/20uMPiP2/2mMATP/100 uM Ca/tCell	T8	1	1		0.125							-0.25	15
ZW151008C3	1	0	20	40	800	vNLP8/0 C2AB/20uMPiP2/2mMATP/100 uM Ca/tCell	0	1	0		0							-0.25	15
ZW151008C4	1	20	20	20	760	vNLP8/0 C2AB/20uMPiP2/2mMATP/100 uM Ca/tCell	T16. No pores (actually ZW did not use in matlab)	1	0		0							-0.25	15	shifted time by 20*40 (T1)+10s(IV)+10s(restart patch).
ZW151008C5	1	30	20	40	770	vNLP8/0 C2AB/20uMPiP2/2mMATP/100 uM Ca/tCell	T7, 20. s4, s7, s20	1	4		0.311688							-0.25	15
ZW151008C6	1	40	20	20	740	vNLP8/0 C2AB/20uMPiP2/2mMATP/100 uM Ca/tCell	T7, 9, 10-11, 18, 19, 20. s9 too small? s14	1	6		0.486486							-0.25	15
ZW151008C7	1	15	20	40	785	vNLP8/0 C2AB/20uMPiP2/2mMATP/100 uM Ca/tCell	0	1	0		0							-0.25	15
ZW151008C8	2	0	20	40	760	vNLP8/0 C2AB/20uMPiP2/2mMATP/100 uM Ca/tCell	T6, 7, 8, 14. Quite noisy. see in matlab. s7-8 v. noisy: ignore	1	6		0.473684							-0.25	15	s3: nice overlapping FPs
ZW151008C9	1	30	20	5	735	vNLP8/0 C2AB/20uMPiP2/2mMATP/100 uM Ca/tCell	T19,20. Too small. Note: ZW marked 2 pores here, but not included in analysis. This file should be consistent with matlab files!	1	0		0
ZW151008C10	5	0	20	40	640	vNLP8/0 C2AB/20uMPiP2/2mMATP/100 uM Ca/tCell	T3, 8, 9, 10, 11, 15-16, 17. s3, 10, 11-12??, s12-16 too noisy.	1	8		0.75							-0.25	15
ZW151008C11	2	35	20	40	725	vNLP8/0 C2AB/20uMPiP2/2mMATP/100 uM Ca/tCell	T9. ZW marked 1 pore here, but no pores in analysis. Must be consistent!	1	0		0							-0.25	15	shifted time by 20*40 (T1)+10s(IV)+10s(restart patch). O2 thresh=0.05pA,minPts=9
ZW151009C1	3	0	20	40	720	vNLP8/0 C2AB/20uMPiP2/2mMATP/100 uM Ca/tCell	T17. No pores!	1	0		0							-0.25	15	O3: thresh=0pA, minPts=10
ZW151009C2	1	0	20	40	800	vNLP8/0 C2AB/20uMPiP2/2mMATP/100 uM Ca/tCell	T10, 15-16	1	4		0.3							-0.25	15
ZW151009C3	1	10	20	35	785	vNLP8/0 C2AB/20uMPiP2/2mMATP/100 uM Ca/tCell	T3, 4, 5, 6, 9, 10. s5, s6, s9. Too noisy after s9	1	5		0.382166							-0.25	15	shifted time by 20*40 (T1)+10s(IV)+10s(restart patch). O1 minPts=10
ZW151009C4	1	40	20	40	760	vNLP8/0 C2AB/20uMPiP2/2mMATP/100 uM Ca/tCell	T9	1	0		0							-0.25	15	shifted time by 20*40 (T1)+10s(IV)+10s(restart patch).
ZW151009C5	1	0	4	40	160	vNLP8/0 C2AB/20uMPiP2/2mMATP/100 uM Ca/tCell	only 4 sweeps.	1	0		0							-0.25	15	O3: thresh=-1pA, minPts=5
ZW151009C6	3	0	20	40	720	vNLP8/0 C2AB/20uMPiP2/2mMATP/100 uM Ca/tCell	T6, 10, 11-12, 13. Noisy s4-5. s6, s10,11,12. 13?	1	8		0.666667							-0.25	15
ZW151009C7	2	0	17	40	640	vNLP8/0 C2AB/20uMPiP2/2mMATP/100 uM Ca/tCell	T13-15. s15? borderline (small)	1	3		0.28125							-0.25	15	shifted time by 20*40 (T1)+10s(IV)+10s(restart patch). O1 thresh=0pA,minPts=10
ZW151009C8	3	0	20	40	720	vNLP8/0 C2AB/20uMPiP2/2mMATP/100 uM Ca/tCell	0	1	0		0							-0.25	15	shifted time by 20*40 (T1)+10s(IV)+10s(restart patch)
ZW151009C9	1	0	19	40	760	vNLP8/0 C2AB/20uMPiP2/2mMATP/100 uM Ca/tCell	T13,20. noisy. not sure if pores	1	0		0							-0.25	15	shifted time by 20*40 (T1)+10s(IV)+10s(restart patch).
ZW151009C10	1	0	20	40	800	vNLP8/0 C2AB/20uMPiP2/2mMATP/100 uM Ca/tCell	T11. No pores (ZW marked 2 here, then no pores in Matlab)	1	0		0							-0.25	15	shifted time by 20*40 (T1)+10s(IV)+10s(restart patch). O3 thresh=0pA,minPts=10
ZW151009C11	1	0	20	40	800	vNLP8/0 C2AB/20uMPiP2/2mMATP/100 uM Ca/tCell	T2,14.too small. ZW marked 2 pores here, then no matlab	1	0		0							-0.25	15
				total rec. s	15380		sum	22	48	Fus rate per cell (/min)
						Overall fusion rate (total pores/recording time), /min	0.187256			std fus rate per cell (/min)
										std err fus rate per cell (/min)

## Sheet: 200nM_NDs
Files opened first in Patchmaster. Filtered at 40-100 Hz. If baseline not stable, ignore recording!!
Export to Matlab:	t=0 is when patch started
use default values for processing traces as much as possible
block size for removing outliers	100						for records with more than one trace: not sure how long passed since end of first trace
cutoff (multiple of SD)	2.5-3						(ZW tries to get a stable baseline by sucking, etc)
block size for averaging trace	80						shift by T1 total record time + IV record time (if present) + 10 sec (typical time spent on reestablishing a stable baseline)
Excise processed trace containing baseline	append "p"	ZW130415C1T2O1p	use to display and plot many openings together, analyze noise in baseline
excise only opening (baseline excluded)	append "pe"	ZW130415C1T2O1pe	use to calculate t_open, t_end, duration, avg level, level histogram...
	each sweep is 40 s	patchmaster, 40Hz filter, scale 100-300			t_tot= (40-x) + [sf- (si+1)]*40 + y
file	baseline stable from sweep si	time x, s in sweep si	till sweep sf	time y in sf	total recording time with stable baseline, s	type	comments	include in analysis?	# Openings (isolated or train)	FR/min	# trains	#terminal opening?	exported to Matlab?	remove outliers block size	remove outliers cutoff (multiple of std dev)	lowpass filtered?	freqs removed	block size for averaging	thresh, pA	minPts
ZW190618C6	1	0	19	40	760	200nMNDs_vNLP8_tC_100CaPIP2	T16-17,T18-19. I split the currents a bit differently. Ignored currents in T18-19 (bad baseline)	1	4	0.315789
ZW190621C3	2	25	16	40	575	200nMNDs_vNLP8_tC_100CaPIP2	T2,T4-6,T8,T11-16. T5-T8 baseline noisy ignore.	1	4	0.417391
ZW190621C7	1	35	20	40	765	200nMNDs_vNLP8_tC_100CaPIP2	0	1	0	0		?
ZW190621C8	1	0	5	40	200	200nMNDs_vNLP8_tC_100CaPIP2	T4-5,T6-7,T10-11,T12,T17-18,T19,T20. T6-20 multiple pores? Bad baseline? can't tell. Ignore. Added 2 pores in T4T5	1	3	0.9							top 20 peaks (autofilter)	40	-0.25	15
ZW190621C9	1	23	14	40	537	200nMNDs_vNLP8_tC_100CaPIP2	T1-2,T3,T5,T10. T7-12 poor baseline.	1	5	0.558659
ZW190717C4	1	0	7	40	280	200nMNDs_vNLP8_tC_100CaPIP2	T3,T5,T6,T7-11,T12-14,T15,T16,T17-18. After T7, it is not clear if the currents are due to bad baseline or multiple pores. Ignore	1	3	0.642857
ZW190717C6	1	10	20	40	790	200nMNDs_vNLP8_tC_100CaPIP2	T1,T2,T5. Also small pore in T3	1	4	0.303797
ZW190717C8	1	0	20	40	800	200nMNDs_vNLP8_tC_100CaPIP2	small pore in s18-19	1	1	0.075
ZW190717C9	1	0	4	5	125	200nMNDs_vNLP8_tC_100CaPIP2	T1-2,T3,T4,T6-9,T10-12,T13-16. Baseline bad after s4.5. Ignore the rest (baseline recovers s13, but safer to ignore)	1	4	1.92
ZW190719C1	3	0	14	10	450	200nMNDs_vNLP8_tC_100CaPIP2	T3,T4-5,T10-11,T13	1	7	0.933333
ZW190729C2	1	15	8	0	265	200nMNDs_vNLP8_tC_100CaPIP2	T1-2,T7-8; Cell dropped at T8. Ignore after T7.	1	1	0.226415
ZW190729C10	1	0	5	40		200nMNDs_vNLP8_tC_100CaPIP2	T1-2. Ignore cell!!	0
ZW190730C4	1	0	20	40	800	200nMNDs_vNLP8_tC_100CaPIP2	T4-5	1	1	0.075
								cells:	FPs:	FR/min
				total rec. s	6347		sum	12	37	0.530687
							stdev			0.534456
							stderr			0.154284

## Sheet: Summary
		fusion pores / min
	0nM	50 nM	100 nM	200 nM
1	0	0.075	0.346154	0.315789
2	0.075	0.075	0.125	0.417391
3	0	0	0	0
4	0	0.225	0	0.9
5	0	0.0839161	0.311688	0.558659
6	0	0.0774194	0.486486	0.642857
7	0	0.315789	0	0.303797
8	0.075	1.71429	0.473684	0.075
9	0	0	0	1.92
10	0	0.1875	0.75	0.933333
11	0.075	0.0774194	0	0.226415
12	0	0.27907	0	0.075
13	0		0.3
14	0		0.382166
15	0		0
16	0		0
17	0		0.666667
18	0		0.28125
19	0		0
20	0		0
21	0		0
22	0		0
23	0
24	0
25	0.225
26	0
Fusion Rate		0.2592	0.187413	0.530687
SD		0.469644	0.243293	0.534456
SE		0.148515	0.0518701	0.154284
ttest			0.279424	0.00726852
