# Supplementary figures and images for: The neuronal calcium sensor Synaptotagmin-1 and SNARE proteins cooperate to dilate fusion pores
Source: eLife journal article supplement (doi:10.7554/elife.68215), 2021-06-30

Figure S2

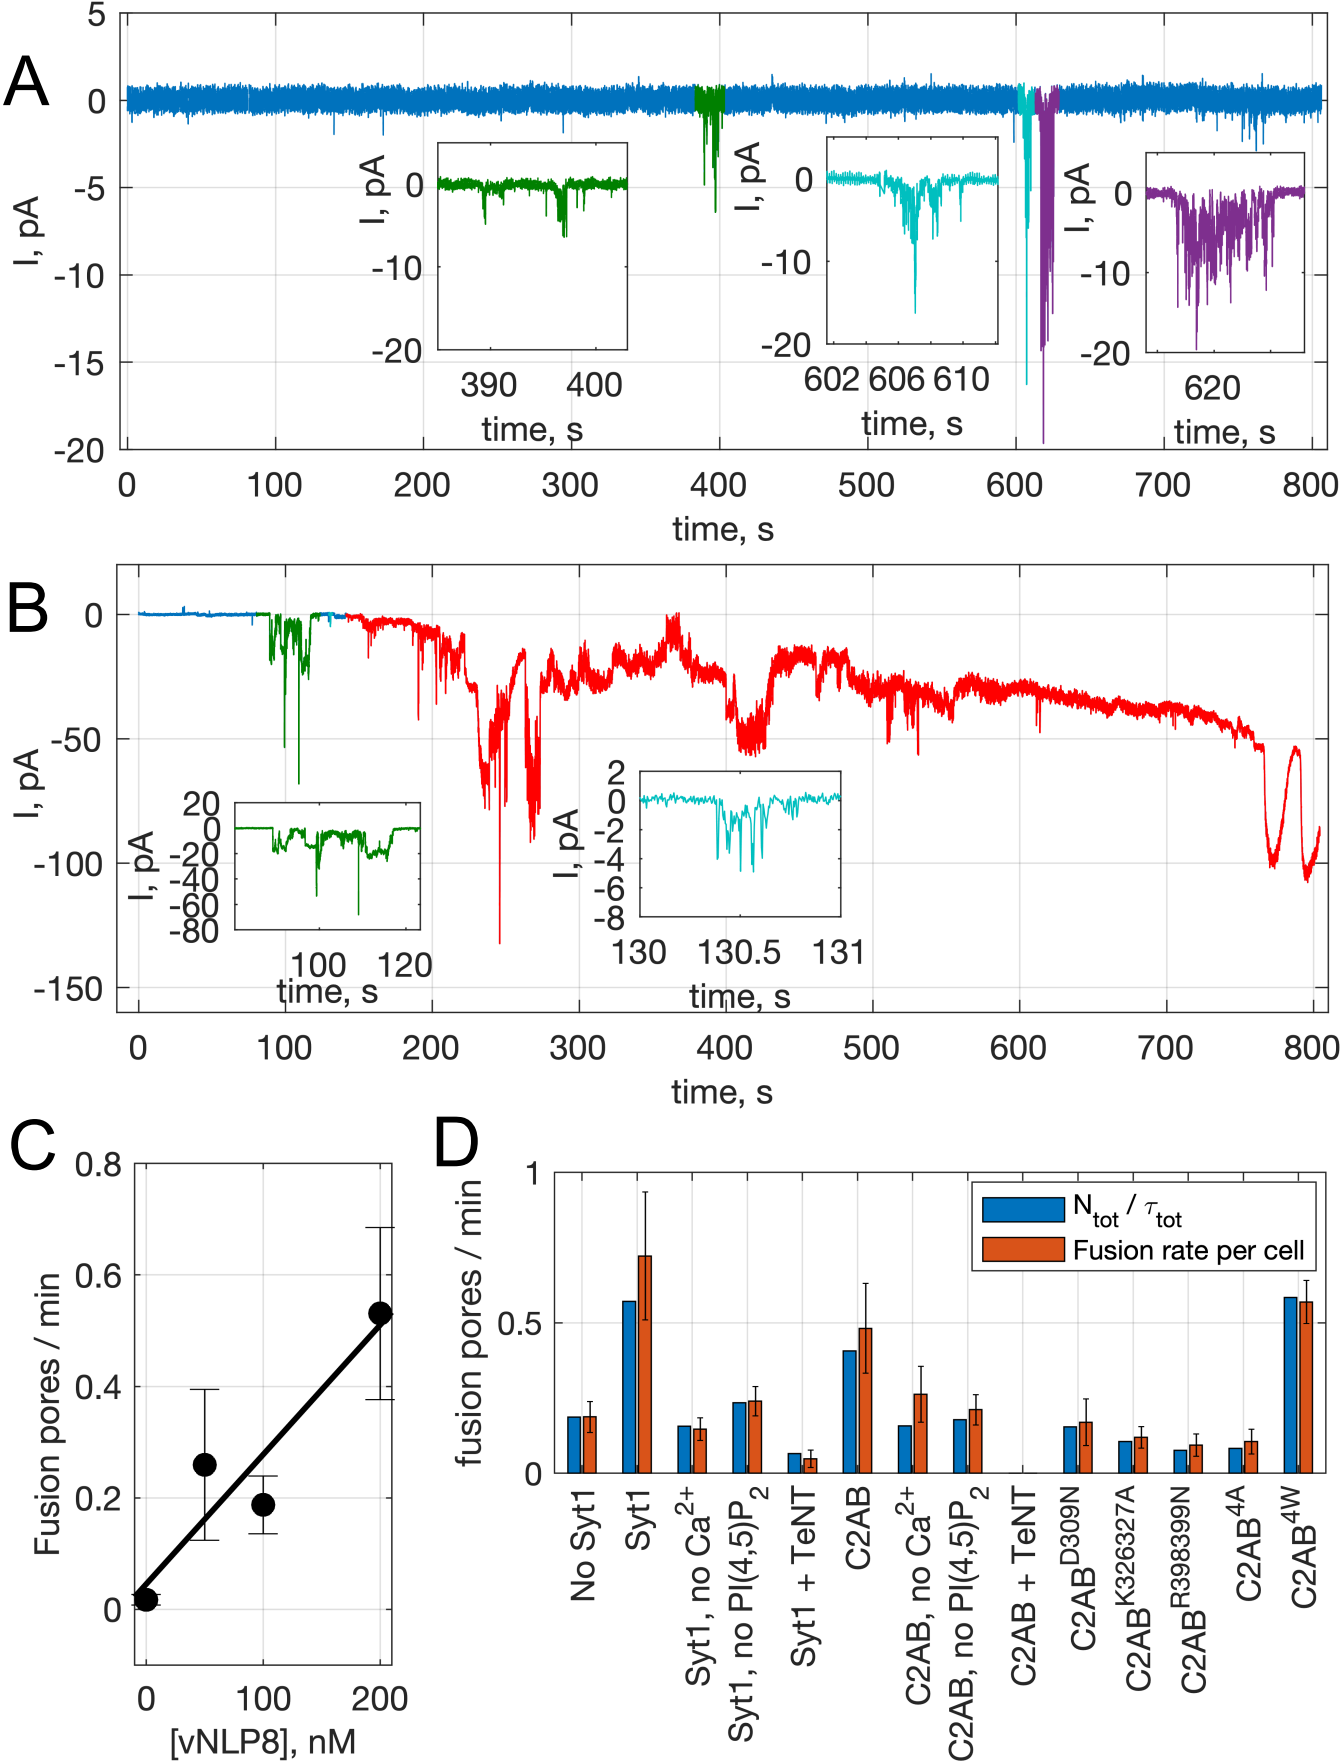

Supplement: supp [file elife-68215-supp-v1.zip]

Figure S6

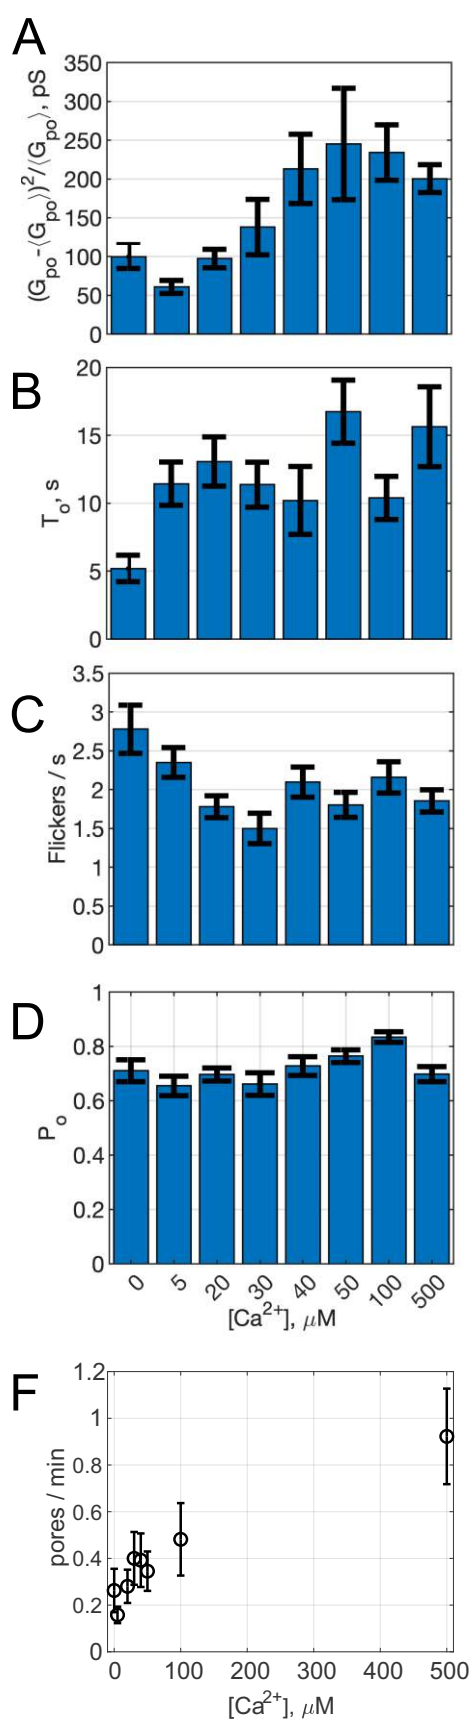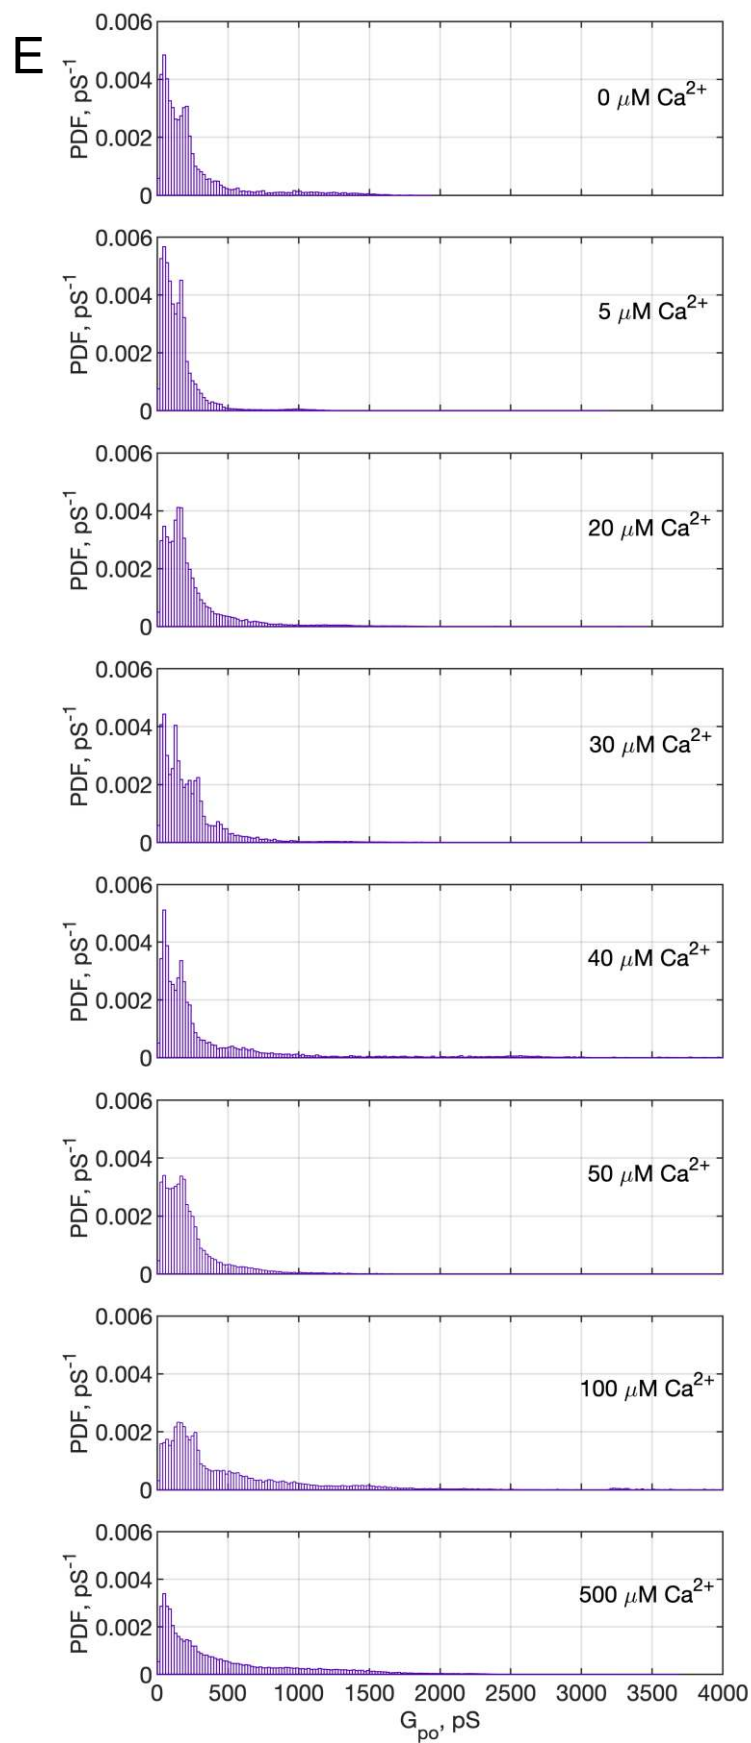

Supplement: supp [file elife-68215-supp-v1.zip]

Figure 5

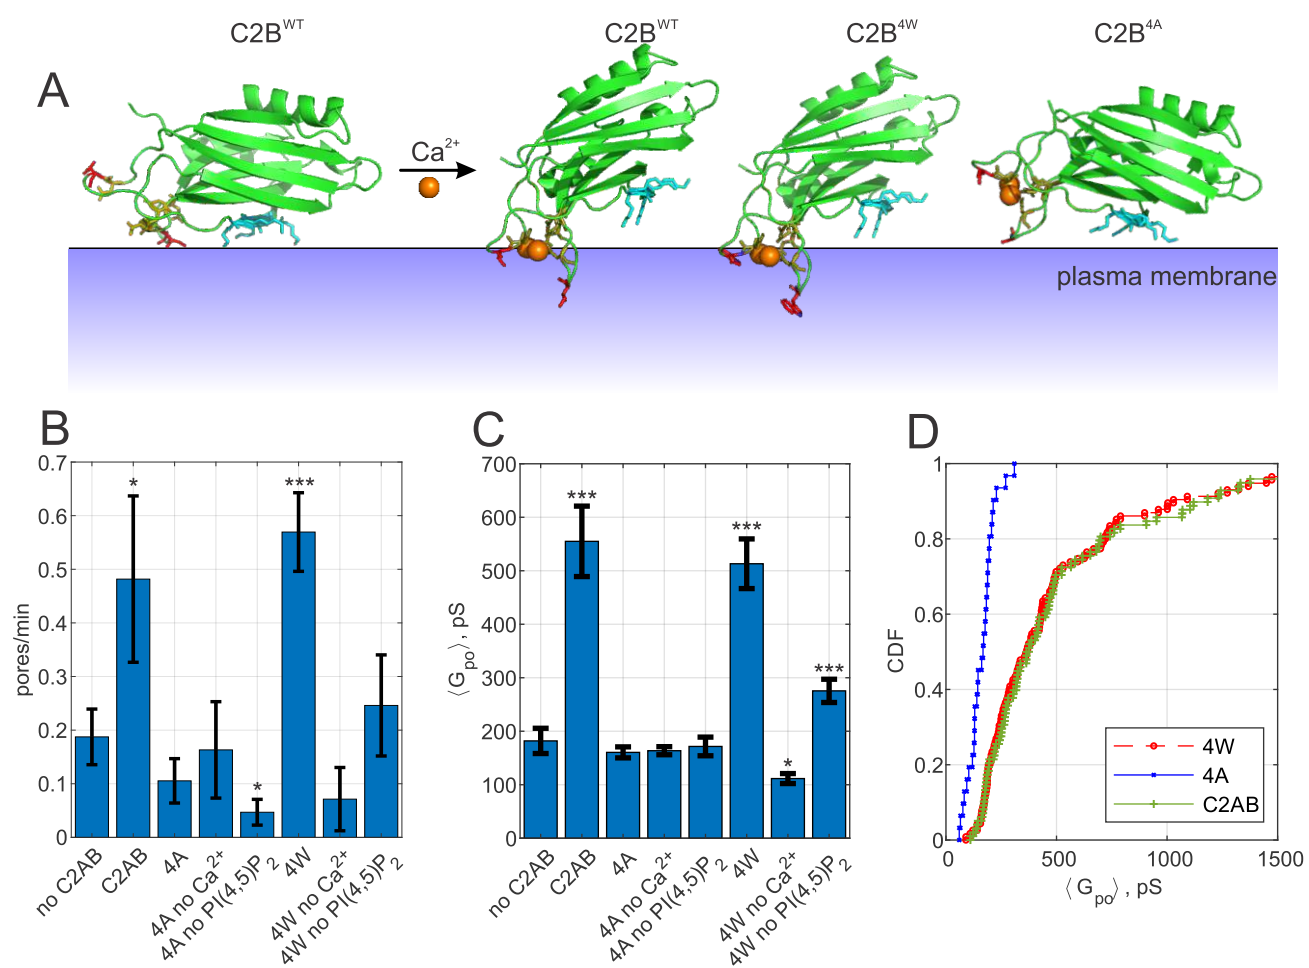

Supplement: supp [file elife-68215-supp-v1.zip]
